# Supplementary material
Source: PubMed Central journal article supplement (PMC3818116)
Supplement: NIHMS520272-supplement-1.pdf [file NIHMS520272-supplement-1.pdf]

**Supplementary Information for:**

**Stimulus-specific enhancement of fear extinction during slow-wave sleep**

K. K. Hauner<sup>1\*</sup>, J. D. Howard<sup>1</sup>, C. Zelano<sup>1</sup>, J. A. Gottfried<sup>1</sup>

<sup>1</sup>Department of Neurology, Feinberg School of Medicine, Northwestern University, Chicago, Illinois, 60611, USA.

**Supplementary Table 1. Regions exhibiting increased fMRI signal for CS+ versus CS- cues (parametrically modulated by SCR) during pre-sleep conditioning.**

| Region                    | L/R | Volume | <i>x</i> | <i>y</i> | <i>z</i> | Peak <i>Z</i> | <i>P</i> value |
|---------------------------|-----|--------|----------|----------|----------|---------------|----------------|
| Middle frontal gyrus      | R   | 22     | 48       | 42       | 10       | 3.268         | 0.0005         |
| Cerebellum                | L   | 13     | -18      | -60      | -40      | 3.128         | 0.0009         |
| Insula                    | R   | 23     | 46       | 18       | 8        | 3.127         | 0.0009         |
| Orbitofrontal cortex      | R   | 20     | 16       | 42       | -12      | 3.015         | 0.0013         |
| Anterior cingulate cortex | R   | 27     | 8        | 48       | 10       | 3.011         | 0.0013         |
| Hippocampus               | R   | 10     | 38       | -22      | -16      | 2.996         | 0.0014         |

Trial-specific SCR was used to estimate fMRI time-courses of conditioning, on a subject-by-subject basis. Volume in mm<sup>3</sup>. L, left hemisphere; R, right hemisphere.

**Supplementary Table 2. Regions exhibiting decreased fMRI signal from pre- to post-sleep in response to tgCS+ versus ntCS+ (adjusted for CS- baselines).**

| Region             | L/R | Volume | <i>x</i> | <i>y</i> | <i>z</i> | Peak <i>Z</i> | <i>P</i> value |
|--------------------|-----|--------|----------|----------|----------|---------------|----------------|
| Dorsolateral PFC   | L   | 120    | -42      | 36       | 24       | 4.034         | 0.00003        |
| Hippocampus        | R   | 40     | 38       | -8       | -24      | 3.849         | 0.00006        |
| Anterior cingulate | R   | 40     | 18       | 28       | 20       | 3.498         | 0.00023        |
| Insula             | R   | 48     | 36       | 18       | 14       | 3.239         | 0.00060        |

Volume in mm<sup>3</sup>. L, left hemisphere; R, right hemisphere. PFC, prefrontal cortex. All regions survived a cross-validation analysis based on an iterative jackknife approach followed by small-volume correction (as described in Online Methods). Clusters passing a corrected threshold of *P* < 0.05 are reported (*P* values for the peak voxels within each cluster are reported here).

Adjustment for CS- baselines was performed by subtracting stimulus-evoked responses to tgCS- and ntCS- from responses to tgCS+ and ntCS+, respectively.

**Supplementary Table 3. Duration of wakefulness and sleep stages during the sleep phase of the study, averaged across all subjects (N=15).**

|              | Wake       | Stage 1    | Stage 2    | SWS        | REM        |
|--------------|------------|------------|------------|------------|------------|
| Minutes      | 17.1 (3.8) | 16.2 (2.7) | 12.0 (2.4) | 18.9 (3.1) | 9.2 (2.1)  |
| Percent time | 21.9 (4.3) | 21.3 (3.1) | 16.4 (3.6) | 28.7 (4.2) | 11.8 (2.7) |

Values shown are  $M (SE)$ . SWS, slow-wave sleep; REM, rapid eye-movement sleep.

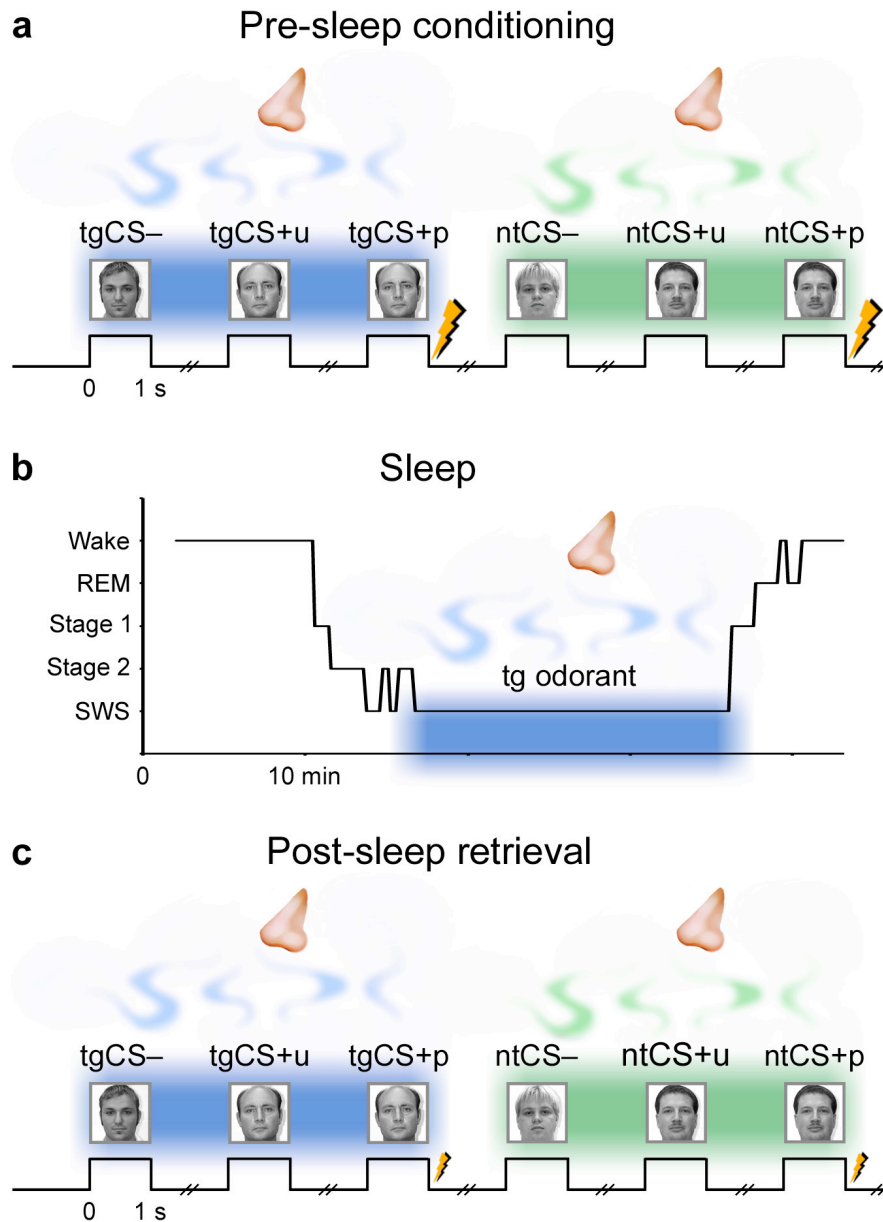

**Supplementary Figure 1.** Experimental paradigm.

**(a)** Contextual fear conditioning was completed in the MRI scanner. “Target” (blue) and “non-target” (green) odorants served as background contexts in alternating trial blocks. Two conditioned stimuli (face images) were presented within the target context (tgCS+, tgCS-), and two within the non-target context (ntCS+, ntCS-). Both tgCS+ and ntCS+ were paired with the

US (mild electric shock) on 50% of trials (tgCS+p, ntCS+p) and were unpaired on the remaining 50% of trials (tgCS+u, ntCS+u). Control stimuli (tgCS-, ntCS-) were never paired with shock.

Stimuli were presented in 8 blocks (4 target, 4 non-target), in pseudo-randomized order.

**(b)** Subjects in slow-wave sleep (SWS) underwent repeated re-exposure to the target odorant (in 30s on-off intervals), outside of the MRI scanner. The hypnogram illustrates sleep-staging data for a representative subject (for group averages, see Supplementary Table 3).

**(c)** Upon awakening, subjects completed a retrieval task in the MRI scanner. This task was identical to the pre-sleep conditioning task, apart from a 12.5% partial-reinforcement schedule, following prior methods (reference 21, main text).

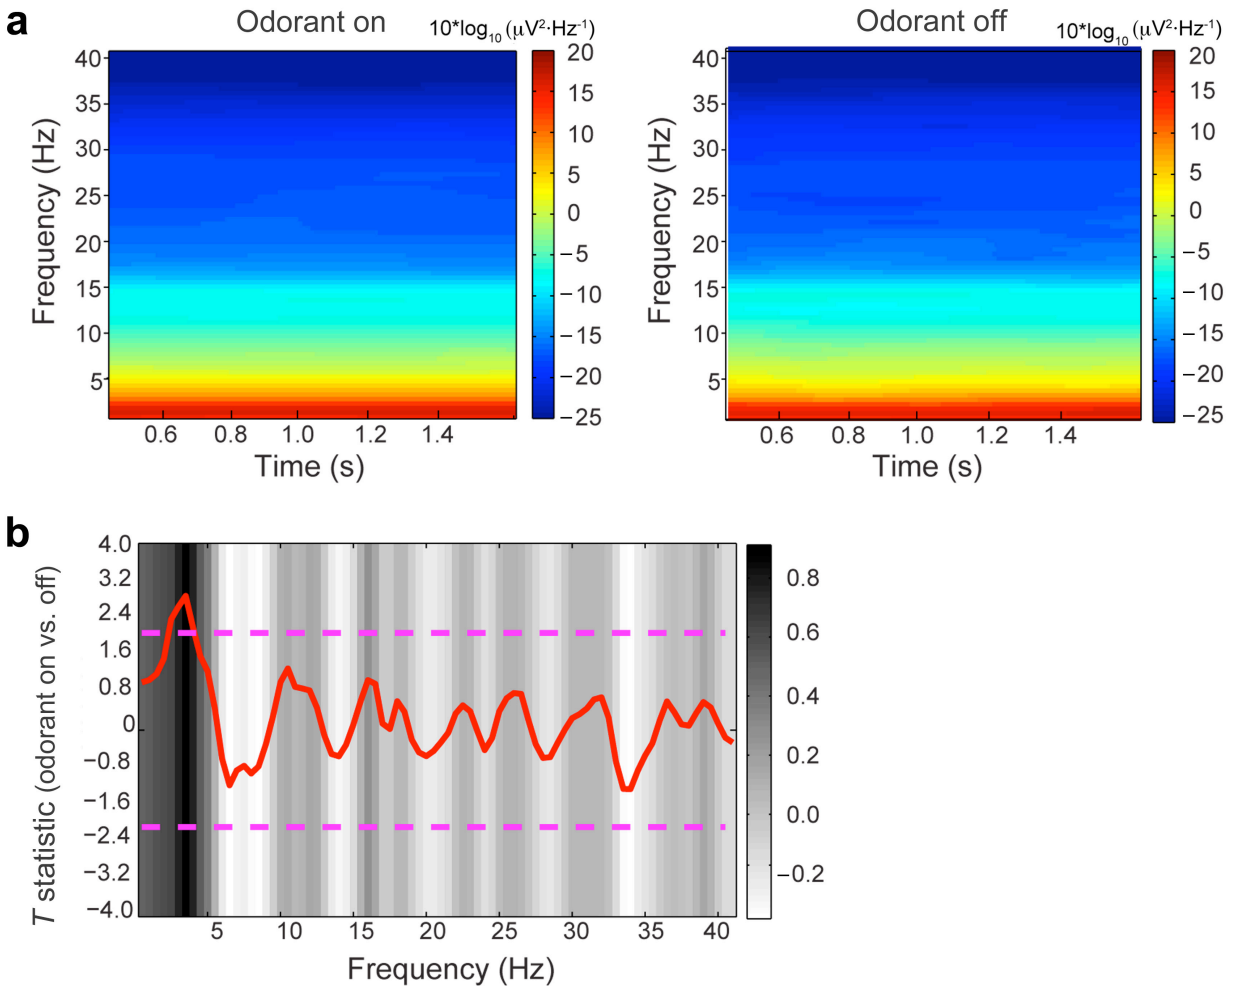

**Supplementary Figure 2.** EEG spectral power analysis during sleep.

**(a)** Mean spectrograms from central electrodes C3 and C4 for odorant-on blocks (left) and odorant-off blocks (right) during slow-wave sleep ( $n=14$ ).

**(b)** Mean EEG power for odorant-on and odorant-off blocks did not significantly differ for the following frequency bands: delta (0–4Hz;  $t[13]=1.77$ ,  $P=0.09$ ), theta (4–8Hz;  $t[13]=0.81$ ,  $P=0.42$ ), alpha (8–12Hz;  $t[13]=0.67$ ,  $P=0.51$ ), beta (12–30Hz;  $t[13]=0.18$ ,  $P=0.85$ ) and gamma (30–40Hz;  $t[13]=-0.03$ ,  $P=0.96$ ). A fine-grained analysis over the full range of frequencies (1–41 Hz, no averaging across bands) revealed significantly increased power during odorant-on versus

odorant-off blocks in the low frequency range of 2.5–4 Hz (and not in alpha frequencies, as would be indicative of awakening). Specifically, significant differences were found for 2.5 Hz ( $t[13]=2.37$ ,  $P=0.03$ ), 3 Hz ( $t[13]=2.64$ ,  $P=0.02$ ), 3.5 Hz ( $t[13]=2.87$ ,  $P=0.01$ ), and 4 Hz ( $t[13]=2.19$ ,  $P=0.04$ ). The gray-scale image reflects the difference in total power at a given frequency for odorant-on versus odorant-off blocks ([odorant on] – [odorant off]). T-statistic values (two-tailed) are represented by the red line ( $n=14$ ). The threshold of statistical significance ( $P=0.05$ ) is represented by the pink dashed line.
